# Supplementary material for: MELK expression correlates with tumor mitotic activity but is not required for cancer growth
Source: eLife. 2018 Feb 8;7:e32838. doi: 10.7554/eLife.32838 (PMC5805410; doi:10.7554/eLife.32838)
Supplement: Supplementary file 1. — Cancer cells lines used in this study and the guide RNAs that they express are displayed. [file elife-32838-supp1.xlsx]

## Sheet: Sheet1
		Supplementary File 1. MELK gRNA sequences
		Cell line	Cancer type	gRNA sequence(s)	Exon(s) targeted	Name in Lin et al. (2017)
		A375 MELK-KO c1	Melanoma	ATGAATTACATGAAACTATT	exon 2	N/A
		A375 MELK-KO c2	Melanoma	TATGAATTACATGAAACTAT	exon 2	N/A
		A375 MELK-KO c3	Melanoma	TATGAATTACATGAAACTAT	exon 2	N/A
		CAL51 MELK-KO c1	Breast cancer	TCAATCTCCGTTTTGATCCG	exon 4	MELK-KO g4.2
		CAL51 MELK-KO c2	Breast cancer	TCAATCTCCGTTTTGATCCG	exon 4	MELK-KO g4.1
		CAL51 MELK-KO c3	Breast cancer	CCGGATCAAAACGGAGATTG	exon 4	MELK-KO g5.1
		DLD1 MELK-KO c1	Colorectal cancer	ATGAATTACATGAAACTATT	exon 2	N/A
		DLD1 MELK-KO c2	Colorectal cancer	TCAATCTCCGTTTTGATCCG	exon 4	N/A
		MDA-MB-231 MELK-KO c1	Breast cancer	ATGAATTACATGAAACTATT	exon 2	MELK-KO g1/g6
				CTATCTGACGGAAGACAACC	exon 5
		MDA-MB-231 MELK-KO c2	Breast cancer	TATGAATTACATGAAACTAT	exon 2	MELK-KO g3/g5
				CCGGATCAAAACGGAGATTG	exon 4
		MDA-MB-231 MELK-KO c3	Breast cancer	ATGAATTACATGAAACTATT	exon 2	MELK-KO g1/g5
				CCGGATCAAAACGGAGATTG	exon 4
		MDA-MB-231 MELK-Mut. s1	Breast cancer	AACCCGATGTGGTGGGTATC	exon 18	MELK g2
		MDA-MB-231 MELK-Mut. s2	Breast cancer	TCAATCTCCGTTTTGATCCG	exon 4	MELK g4
