# Supplementary material for: MELK expression correlates with tumor mitotic activity but is not required for cancer growth
Source: eLife. 2018 Feb 8;7:e32838. doi: 10.7554/eLife.32838 (PMC5805410; doi:10.7554/eLife.32838)
Supplement: Supplementary file 2. — The sequences of all PCR primers used in this study are displayed. [file elife-32838-supp2.xlsx]

## Sheet: TIDE
		Supplementary File 2. PCR primers to amplify MELK gRNA cut sites
		Exon	Forward Primer	Reverse Primer
		Exon 2	TAGATTTGCAGTTACAAGAATGGAG	ACTATTCTCCTCTCTGCTTGCTC
		Exon 4	AGTATTGGAGCTTGGAACACC	TCCCTCTAGGAGAAAATTCTAACAT
		Exon 5	ATAAAACCCTGGGTGAGCTTTT	TGATAGGTATGACTGGAGCAACA
