# Supplementary material for: MELK expression correlates with tumor mitotic activity but is not required for cancer growth
Source: eLife. 2018 Feb 8;7:e32838. doi: 10.7554/eLife.32838 (PMC5805410; doi:10.7554/eLife.32838)
Supplement: Supplementary file 3. — Cox proportional hazards survival analysis was performed on 15 breast cancer microarray datasets correlating the length of patient survival with either MELK expression or with a proliferation meta-gene comprising MKI67, PCNA, CCNB1, MCM2, and TOP2A. [file elife-32838-supp3.xlsx]

## Sheet: Sheet1
		Supplementary File 3. Univariate Cox proportional hazards models of breast cancer outcome and the expression of a proliferation meta-gene or of MELK.
						Proliferation univariate model		MELK univariate model
		Cohort Identifier	Platform	Clinical endpoint	Number of patients	Z score	P value	Z score	P value
		GSE11121	GPL96	Distant metastasis-free survival	200	3.7074	< 0.001	4.28055	< 0.001
		GSE1456	GPL96	Disease-specific survival	159	3.33266	< 0.001	3.63373	< 0.001
		GSE17705	GPL96	Distant relapse-free survival	298	3.42071	< 0.001	2.6006	0.009306
		GSE2034	GPL96	Relapse-free survival	286	3.28882	0.001006	3.30866	< 0.001
		GSE22219	GPL6098	Distant recurrence-free survival	216	4.38683	< 0.001	4.68507	< 0.001
		GSE24450	GPL6947	Overall survival	183	3.2519	0.001146	3.69732	< 0.001
		GSE25055	GPL96	Distant recurrence-free survival	310	2.64033	0.008282	3.60918	< 0.001
		GSE25065	GPL96	Distant recurrence-free survival	198	1.44114	0.149546	2.55928	0.010491
		GSE3143	GPL8300	Overall survival	158	1.863	0.062462	2.12888	0.033271
		GSE31448	GPL570	Disease-free survival	248	3.26796	0.001083	3.46034	< 0.001
		GSE3494	GPL96	Disease-specific survival	236	3.59411	< 0.001	3.60612	< 0.001
		GSE45725	GPL6883	Recurrence-free survival	333	2.53382	0.011283	2.98546	0.002832
		GSE4922	GPL96	Disease-free survival	249	4.14212	< 0.001	3.64133	< 0.001
		GSE6532	GPL96	Recurrence-free survival	241	2.34681	0.018935	2.27141	0.023123
		GSE7390	GPL96	Overall survival	198	2.48649	0.012901	1.94919	0.051283
