# Supplementary material for: MELK expression correlates with tumor mitotic activity but is not required for cancer growth
Source: eLife. 2018 Feb 8;7:e32838. doi: 10.7554/eLife.32838 (PMC5805410; doi:10.7554/eLife.32838)
Supplement: Supplementary file 4. — Cox proportional hazards survival analysis was performed on 15 breast cancer microarray datasets correlating the length of patient survival with both MELK expression and with a proliferation meta-gene comprising MKI67, PCNA, CCNB1, MCM2, and TOP2A. [file elife-32838-supp4.xlsx]

## Sheet: Sheet1
		Supplementary File 4. Bivariate Cox proportional hazards models of breast cancer outcome and the expression of a proliferation meta-gene and of MELK.
						Bivariate Model
						Proliferation meta-gene		MELK
		Cohort Identifier	Platform	Clinical endpoint	Number of patients	Z score	P value	Z score	P value
		GSE11121	GPL96	Distant metastasis-free survival	200	1.04261	0.297129	1.89935	0.057518
		GSE1456	GPL96	Disease-specific survival	159	0.541649	0.58806	1.43766	0.150531
		GSE17705	GPL96	Distant relapse-free survival	298	2.36135	0.018208	-0.278586	0.780562
		GSE2034	GPL96	Relapse-free survival	286	1.16811	0.242763	0.954888	0.339634
		GSE22219	GPL6098	Distant recurrence-free survival	216	1.30948	0.190373	1.55838	0.119142
		GSE24450	GPL6947	Overall survival	183	0.736483	0.461437	1.70378	0.088422
		GSE25055	GPL96	Distant recurrence-free survival	310	-0.342604	0.731896	2.60433	0.009205
		GSE25065	GPL96	Distant recurrence-free survival	198	-0.691421	0.489301	2.2871	0.02219
		GSE3143	GPL8300	Overall survival	158	1.17067	0.241731	1.61295	0.106756
		GSE31448	GPL570	Disease-free survival	248	0.575104	0.565221	1.32296	0.185848
		GSE3494	GPL96	Disease-specific survival	236	1.24485	0.213186	0.795167	0.426516
		GSE45725	GPL6883	Recurrence-free survival	333	-0.128641	0.897642	1.89803	0.057692
		GSE4922	GPL96	Disease-free survival	249	2.15441	0.031208	0.0789	0.937112
		GSE6532	GPL96	Recurrence-free survival	241	0.725165	0.468351	0.12663	0.899234
		GSE7390	GPL96	Overall survival	198	1.65527	0.09787	-0.351874	0.724933
